# Supplementary material
Source: PubMed Central journal article supplement (PMC3652472)
Supplement: NIHMS419837-supplement-1_si_001.pdf [file NIHMS419837-supplement-1_si_001.pdf]

# Supporting Information for Fragment-based Quantum Mechanical/Molecular Mechanical Simulations of Thermodynamic and Kinetic Process of the $\text{Ru}^{2+}$ - $\text{Ru}^{3+}$ Self-Exchange Electron Transfer

Xiancheng Zeng<sup>a</sup>, Xiangqian Hu<sup>a</sup>, and Weitao Yang<sup>a,b</sup>

<sup>a</sup> Department of Chemistry, Duke University, Durham, NC 27708, USA.

<sup>b</sup> Department of Physics, Faculty of Science, King Abdulaziz University, P.O. Box 80203, Jeddah 21589, Saudi Arabia

## Supplemental Figures

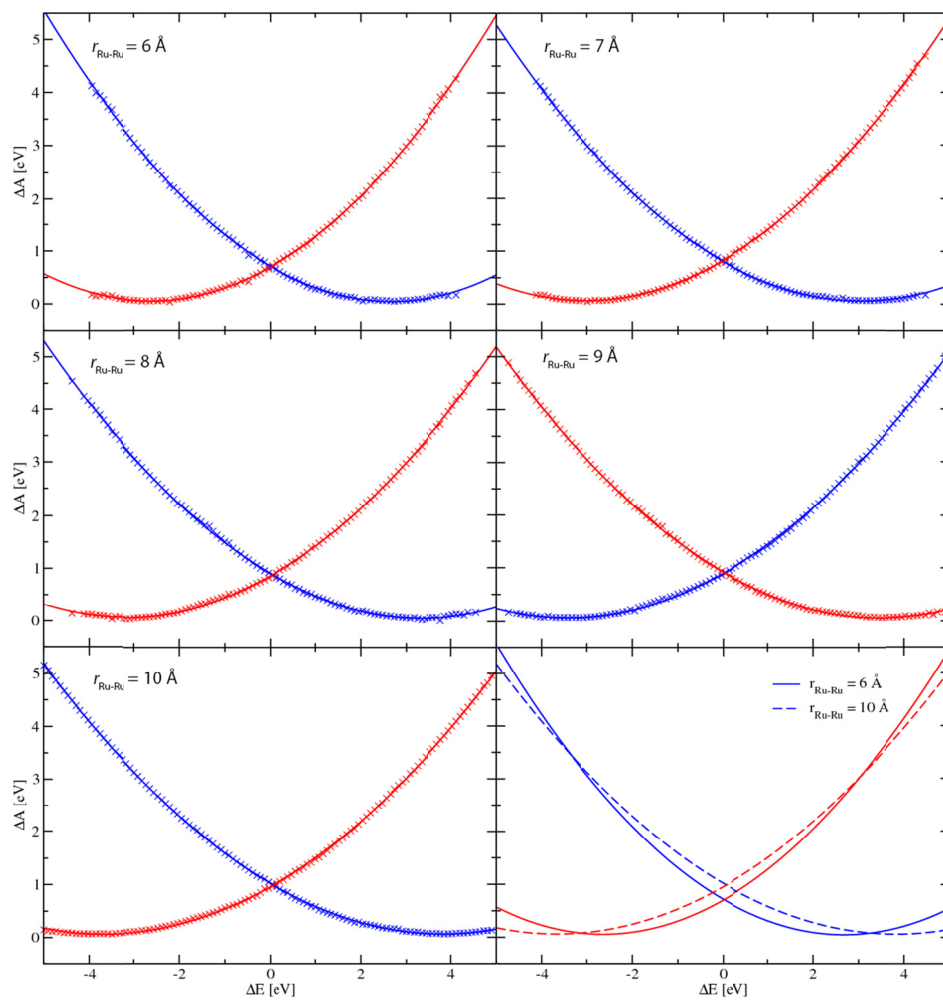

Fig. S1 Diabatic energy profiles of  $\text{Ru}^{2+}$ - $\text{Ru}^{3+}$  self-exchange at different distances (6.0 Å, 7.0 Å, 8.0 Å, 9.0 Å, and 10.0 Å)

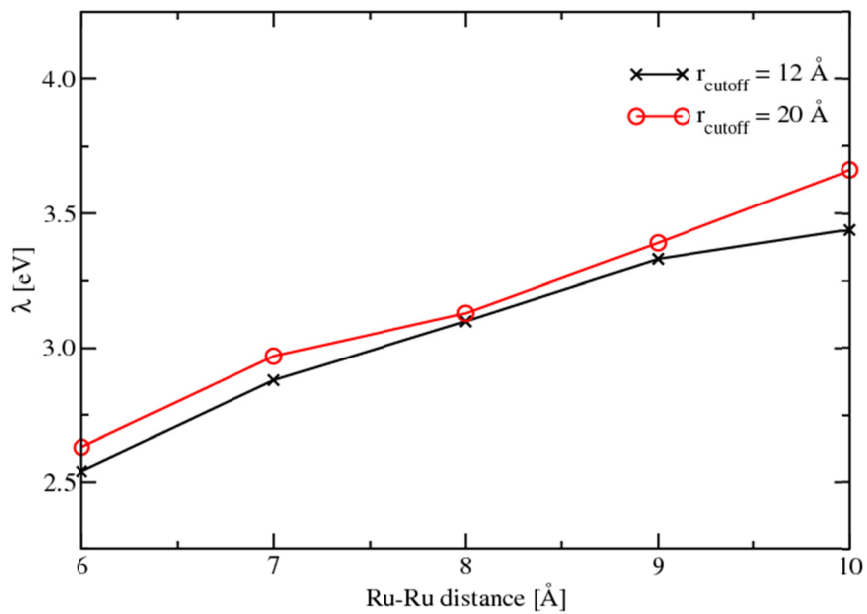

Fig. S2 Convergence of the reorganization energies with different QM/MM cutoff (12 Å and 20 Å)

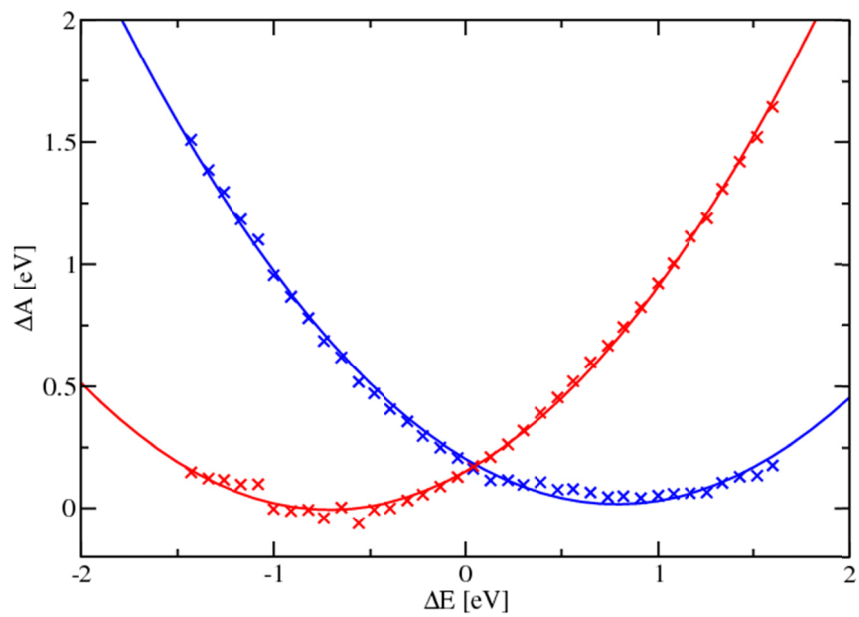

Fig. S3 Inner reorganization energy of Ru-Ru at distance of 8 Å

## Supplementary Tables

Table S1. ECP parameters in Gaussian 94 ECP format for H, O, and Ru atoms using BLYP/LanL2DZ with grid=80×194 for frozen fragment pseudopotential of DFI

| H | 0         | O        | 0         | Ru       | 0         |
|---|-----------|----------|-----------|----------|-----------|
| s | potential | s        | potential | s        | potential |
|   | 3         |          | 3         |          | 3         |
| 2 | 52.70108  | 15.13984 | 2         | 0.41467  | 0.33298   |
| 2 | 10.69874  | 13.88517 | 2         | 39.56192 | 139.36823 |
| 2 | 62.52761  | 13.39176 | 2         | 4.25966  | 20.21308  |
|   |           |          |           | 2        | 17.88425  |
|   |           |          |           |          | 33.10262  |

Table S2. Dependence of the reorganization energies on the QM/MM cutoff  $r_{\text{cutoff}}$  (8 Å, 12 Å, and 20 Å)

| $r/\text{Å}$ | $\lambda(r_{\text{cutoff}}=8\text{ Å})/\text{eV}$ | $\lambda(r_{\text{cutoff}}=12\text{ Å})/\text{eV}$ | $\lambda(r_{\text{cutoff}}=20\text{ Å})/\text{eV}$ |
|--------------|---------------------------------------------------|----------------------------------------------------|----------------------------------------------------|
| 6.0          | 2.50                                              | 2.54                                               | 2.63                                               |
| 7.0          | -                                                 | 2.88                                               | 2.97                                               |
| 8.0          | -                                                 | 3.10                                               | 3.13                                               |
| 9.0          | -                                                 | 3.33                                               | 3.39                                               |
| 10.0         | 2.60                                              | 3.44                                               | 3.66                                               |

Table S3. Components to compute the final ET rate constant. The computed rate constant using Eq. 1 is  $0.11\text{ M}^{-1}\text{s}^{-1}$  without other corrections.

| $r/\text{Å}$ | $\langle H_{\text{AD}}^2 \rangle^{1/2}/\text{eV}$ | $\lambda(r_{\text{cutoff}}=20\text{ Å})/\text{eV}$ | $\lambda_{\text{scale}}/\text{eV}$ | $k_{\text{ET}}/\text{s}^{-1}$ | $\Delta G/\text{eV}$ |
|--------------|---------------------------------------------------|----------------------------------------------------|------------------------------------|-------------------------------|----------------------|
| 6.0          | 2.03E-03                                          | 2.63                                               | 1.66                               | 5.88E+03                      | 2.50E-01             |
| 7.0          | 3.33E-04                                          | 2.97                                               | 1.87                               | 1.87E+01                      | 1.70E-01             |
| 8.0          | 1.07E-04                                          | 3.23                                               | 2.03                               | 3.80E-01                      | 1.18E-01             |
| 9.0          | 3.75E-05                                          | 3.40                                               | 2.14                               | 1.62E-02                      | 8.31E-02             |
| 10.0         | 1.66E-05                                          | 3.66                                               | 2.31                               | 6.28E-04                      | 5.93E-02             |
